# Supplementary material for: Increased NHE1 expression is targeted by specific inhibitor cariporide to sensitize resistant breast cancer cells to doxorubicin in vitro and in vivo
Source: PubMed Central journal article supplement (PMC6408845; doi:10.1186/s12885-019-5397-7), 2019-03-08

A

### Comparison of SLC9A1 Across 7 Analyses Over-expression

| Median Rank | p-Value | Gene   |   |   |   |   |   |   |   |
|-------------|---------|--------|---|---|---|---|---|---|---|
| 558.0       | 0.018   | SLC9A1 |   |   |   |   |   |   |   |
|             |         |        | 1 | 2 | 3 | 4 | 5 | 6 | 7 |

**Legend**

- 1. Ductal Breast Carcinoma in Situ vs. Normal  
*Radvanyi Breast, Proc Natl Acad Sci U S A, 2005*
- 2. Invasive Ductal Breast Carcinoma vs. Normal  
*Radvanyi Breast, Proc Natl Acad Sci U S A, 2005*
- 3. Invasive Lobular Breast Carcinoma vs. Normal  
*Radvanyi Breast, Proc Natl Acad Sci U S A, 2005*
- 4. Invasive Mixed Breast Carcinoma vs. Normal  
*Radvanyi Breast, Proc Natl Acad Sci U S A, 2005*
- 5. Invasive Lobular Breast Carcinoma vs. Normal  
*TCGA Breast, No Associated Paper, 2011*
- 6. Invasive Ductal Breast Carcinoma vs. Normal  
*Zhao Breast, Mol Biol Cell, 2004*
- 7. Lobular Breast Carcinoma vs. Normal  
*Zhao Breast, Mol Biol Cell, 2004*

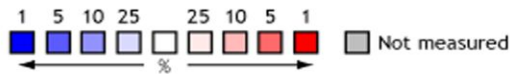

B

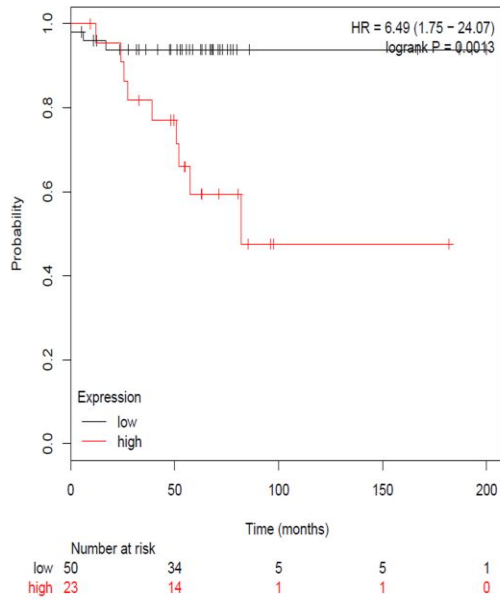

C

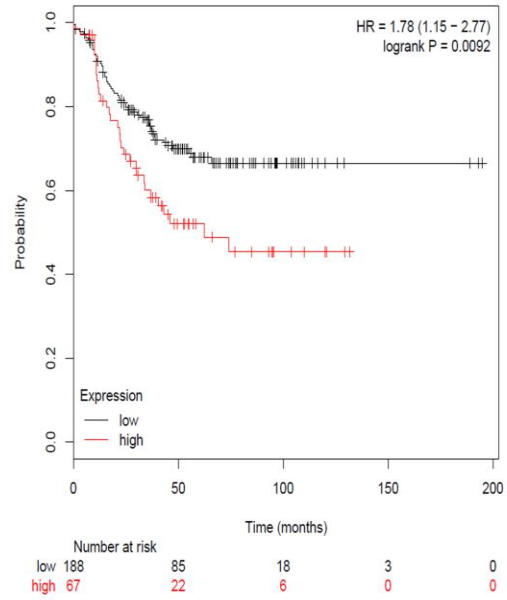

Supplement: 12885_2019_5397_MOESM1_ESM.pdf [file 12885_2019_5397_MOESM1_ESM.pdf]
